# Supplementary material
Source: PubMed Central journal article supplement (PMC2918947)
Supplement: supp_76_16_5479__1.pdf [file supp_76_16_5479__1.pdf]

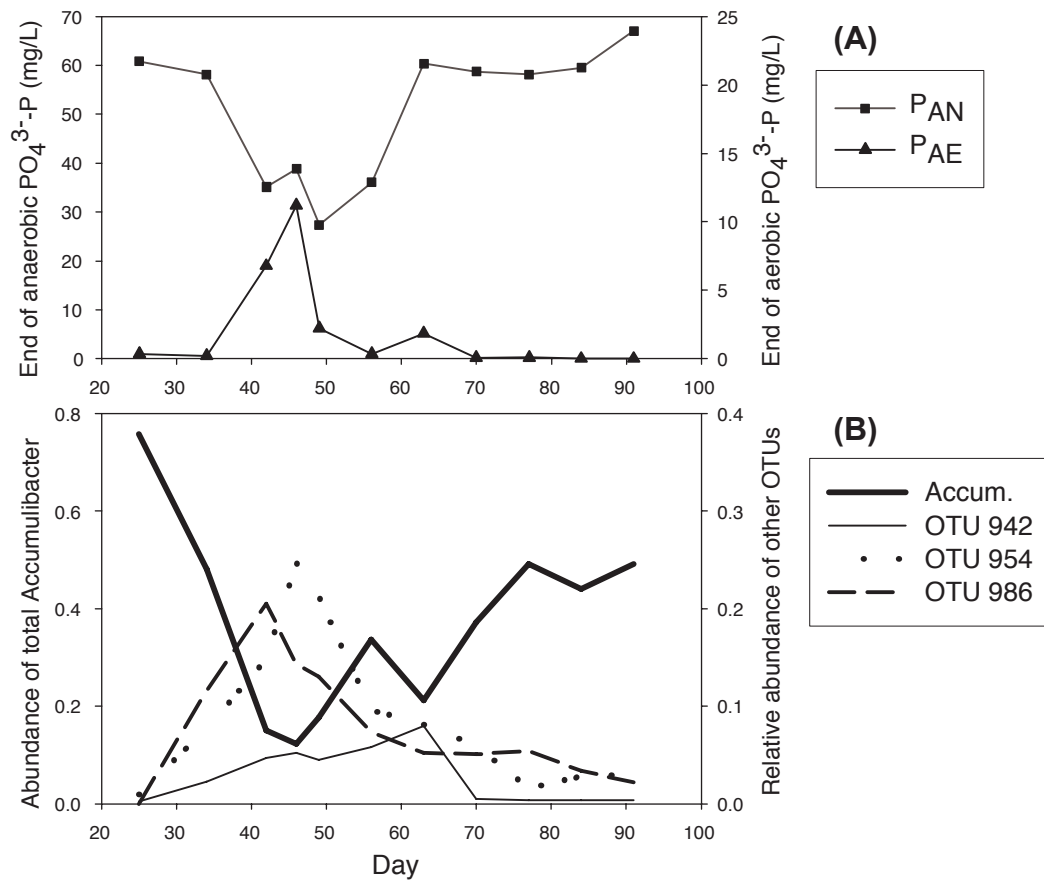

**FIG. S1.** Performance of R2 (panel A) and relative abundance of total *Accumulibacter* and OTUs correlated to the poor performance (panel B). Relative abundances were measured using semiquantitative ARISA.
